# Supplementary figures and images for: Regulation of the surface morphology of microspheres by polymers with different crystallinities
Source: Royal Society of Chemistry journal article supplement (doi:10.1039/d4nj05113k), 2025-01-01

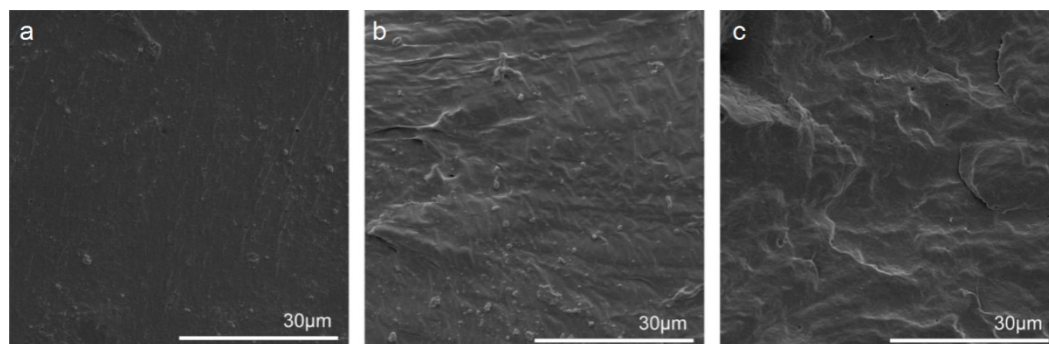

Figure S1. (a,b and c) SEM images of the section micromorphology of PLGA, PTMC, PCL.

Supplement: d4nj05113k1.pdf [file d4nj05113k1.pdf]
